# Supplementary material
Source: PubMed Central journal article supplement (PMC2639315)

# Supplemental Figure 1

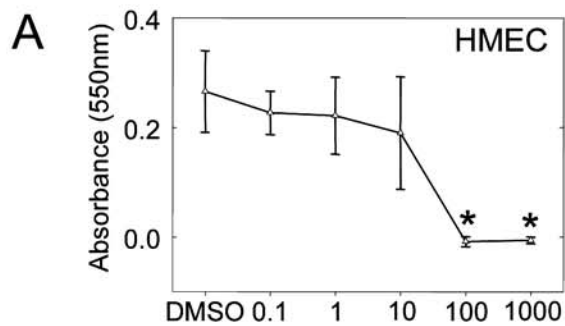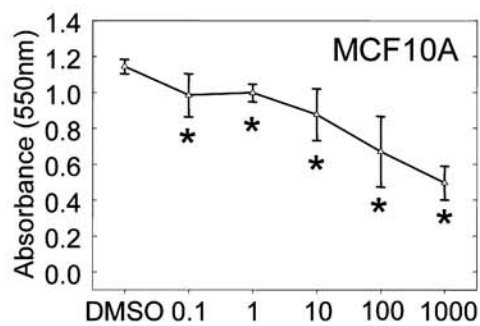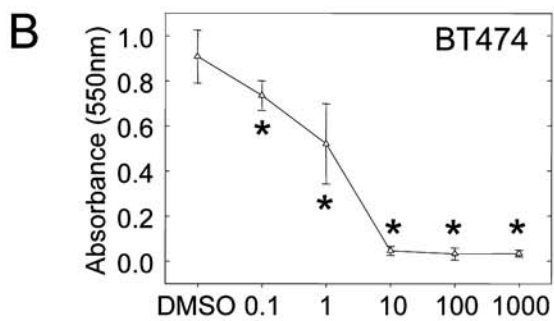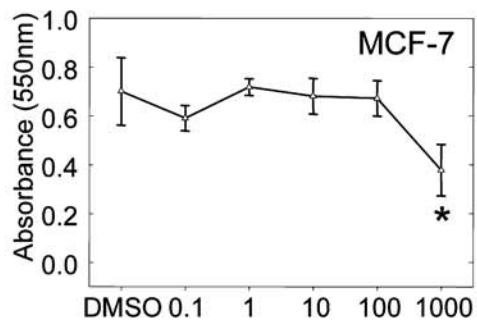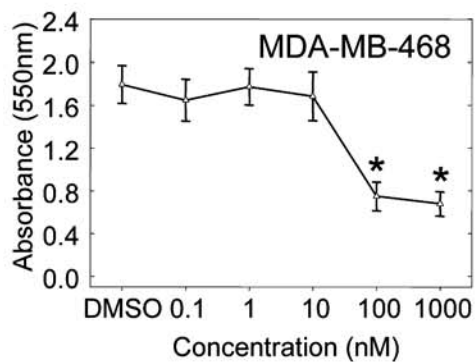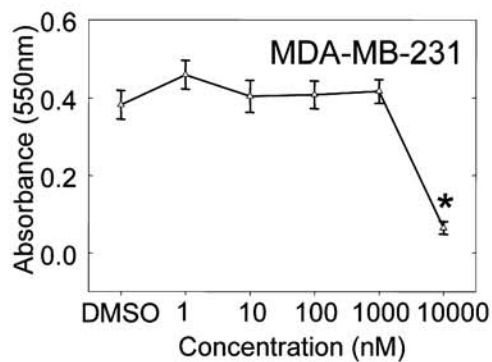

Supplement: djn436_1.pdf [file djn436_1.pdf]

# Supplemental Figure 3

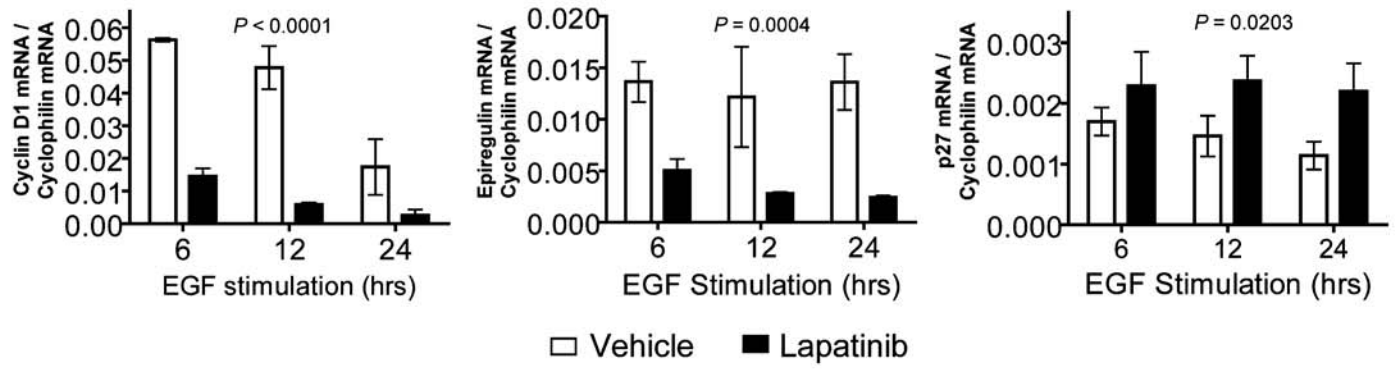

Supplement: djn436_3.pdf [file djn436_3.pdf]
